# Supplementary material for: Bacillus subtilis Produces Amino Acids to Stimulate Protein Synthesis in Ruminal Tissue Explants via the Phosphatidylinositol-4,5-Bisphosphate 3-Kinase Catalytic Subunit Beta–Serine/Threonine Kinase–Mammalian Target of Rapamycin Complex 1 Pathway
Source: Front Vet Sci. 2022 Jun 27;9:852321. doi: 10.3389/fvets.2022.852321 (PMC9272757; doi:10.3389/fvets.2022.852321)
Supplement: Supplementary file 2 [file Data_Sheet_2.xlsx]

## Sheet: Figure S1
	Ph	3	0.72	0.652	0.602
		4	0.991	1.022	1.121
		5	1.348	1.19	1.314
		6	1.634	1.605	1.687
		7	1.868	1.724	1.769
		8	1.762	1.736	1.741
		8	1.762	1.736	1.741
		9	1.586	1.552	1.563
	Culture temperature/℃	32	1.494	1.444	1.421
		34	1.585	1.591	1.52
		36	1.652	1.637	1.689
		37	1.749	1.707	1.752
		38	1.727	1.769	1.792
		40	1.695	1.652	1.642
	Bile salt concentration（%）	0	1.728	1.731	1.724
		0.5	1.68	1.695	1.648
		1	1.569	1.51	1.556
		1.5	1.453	1.402	1.408
		2	1.384	1.327	1.342

## Sheet: Figure 3
	MA													MB
	0h	2h	4h	8h	12h	16h	20h	24h	48h	72h				0h	2h	4h	8h	12h	16h	20h	24h	48h	72h
Gene	25.08	25.76	25.2	26.17	26.32	26.57	26.05	27.55	26.45	27.62			Gene	23.06	25.4	25.26	25.35	24.96	25.19	25.11	26.32	25.71	28.89
	24.82	25.59	25.16	25.88	26.26	26.04	26.22	27.63	26.64	27.59				22.84	25.24	25.18	25.26	24.65	25.46	25.36	26.99	26.13	28.63
	24.93	25.56	25.31	26.23	26.44	26.43	26.42	27.72	26.34	27.83				22.76	25.25	25.35	25.23	24.33	25.34	25.74	26.55	26.12	28.77
	26.41	27.09	26.53	27.5	27.65	27.9	27.38	28.88	27.78	28.95				23.39	25.73	25.59	25.68	24.89	25.52	25.44	26.65	26.04	29.22
	26.15	26.92	26.49	27.21	27.59	27.37	27.55	28.96	27.97	28.92				23.17	25.57	25.51	25.59	24.98	25.79	25.69	27.32	26.46	28.96
	26.26	26.89	26.64	27.56	27.77	27.76	27.75	29.05	27.67	29.16				23.09	25.58	25.68	25.56	24.66	25.67	26.07	26.88	26.45	29.1
	25.11	25.89	25.33	26.3	26.45	26.7	26.18	27.68	26.58	27.75				24.01	26.35	26.21	26.3	25.41	26.14	26.06	27.27	26.66	29.84
	24.95	25.72	25.29	26.01	26.39	26.17	26.35	27.76	26.77	27.72				23.79	26.19	26.13	26.21	25.6	26.41	26.31	27.94	27.08	29.58
	25.06	25.69	25.44	26.16	26.57	26.56	26.55	27.85	26.47	27.96				23.71	26.2	26.3	26.18	25.28	26.29	26.69	27.5	27.07	29.72
Actin	24.36	24.96	24.67	25.44	25.85	24.27	24.15	25.2	24.11	25.37			Actin	21.49	24.13	24.34	24.04	23.68	22.23	22.54	23.23	23.04	25.85
	23.19	24.65	24.43	25.27	25.59	24.27	23.9	25.37	23.76	25.01				21.55	24.09	24.47	24.48	23.87	22.41	22.31	23.53	23.17	25.21
	23.23	24.63	24.53	25.34	25.71	24.31	24.12	25.33	24.01	25.33				21.22	24.33	24.32	24.56	23.55	22.68	22.45	24.13	22.85	25.59
	25.83	26.43	26.14	26.91	27.32	25.74	25.62	26.67	25.58	26.84				21.95	24.59	24.8	24.5	24.14	22.69	23	23.69	23.5	26.31
	24.66	26.12	25.9	26.74	27.06	25.74	25.37	26.84	25.23	26.48				22.01	24.55	24.93	24.94	24.33	22.87	22.77	23.99	23.63	25.67
	24.7	26.1	26	26.81	27.18	25.78	25.59	26.8	25.48	26.8				21.68	24.79	24.78	25.02	24.01	23.14	22.91	24.59	23.31	26.05
	24.73	24.63	24.34	25.31	25.52	23.94	23.82	24.87	23.78	25.04				22.36	25	25.21	24.91	24.55	23.1	23.41	24.1	23.91	26.72
	22.86	24.62	24.37	25.24	25.46	23.94	23.57	25.04	23.43	24.68				22.42	24.96	25.34	25.35	24.74	23.28	23.18	24.4	24.04	26.08
	22.9	24.45	24.2	25.37	25.38	23.98	23.79	25	23.68	25				22.09	25.2	25.19	25.43	24.42	23.55	23.32	25	23.72	26.46
ACTIN(mean value)	23.5933	24.7467	24.5433	25.35	25.7167	24.2833	24.0567	25.3	23.96	25.2367			ACTIN(mean value)	21.42	24.1833	24.3767	24.36	23.7	22.44	22.4333	23.63	23.02	25.55
	25.0633	26.2167	26.0133	26.82	27.1867	25.7533	25.5267	26.77	25.43	26.7067				21.88	24.6433	24.8367	24.82	24.16	22.9	22.8933	24.09	23.48	26.01
	23.4967	24.5667	24.3033	25.3067	25.4533	23.9533	23.7267	24.97	23.63	24.9067				22.29	25.0533	25.2467	25.23	24.57	23.31	23.3033	24.5	23.89	26.42
Result	0.356836	0.4954	0.634342	0.566442	0.658231	0.204948	0.251158	0.210224	0.178006	0.191666			Result	0.320856	0.430276	0.542113	0.503478	0.417544	0.148651	0.156402	0.154963	0.154963	0.0987552
	0.427304	0.557354	0.652176	0.692555	0.686184	0.295931	0.22324	0.198884	0.156041	0.195693				0.373712	0.480742	0.573024	0.535887	0.517632	0.123279	0.131518	0.0973956	0.115824	0.118257
	0.395934	0.569066	0.587774	0.543367	0.605696	0.225834	0.194342	0.186856	0.192109	0.165702				0.395021	0.477421	0.509328	0.547147	0.646176	0.133972	0.101063	0.132127	0.116629	0.107321
	0.393199	0.545884	0.698985	0.624165	0.725309	0.225834	0.276752	0.231647	0.196146	0.211198				0.351111	0.470848	0.593231	0.550953	0.602904	0.162668	0.17115	0.169576	0.169576	0.108067
	0.470848	0.614152	0.718636	0.76313	0.756109	0.326088	0.245989	0.219151	0.171943	0.215636				0.408951	0.526072	0.627056	0.586417	0.566442	0.134904	0.143919	0.106579	0.126745	0.129408
	0.436282	0.627056	0.647671	0.598739	0.66742	0.248847	0.214146	0.205898	0.211686	0.182588				0.432269	0.522439	0.557354	0.598739	0.707107	0.146604	0.110593	0.144586	0.127627	0.11744
	0.326842	0.399611	0.490843	0.502316	0.501157	0.148995	0.182588	0.15283	0.129408	0.139339				0.303549	0.407066	0.512871	0.476319	0.558644	0.140632	0.147966	0.146604	0.146604	0.0934281
	0.365177	0.449585	0.504642	0.614152	0.522439	0.215138	0.162292	0.144586	0.11344	0.142266				0.353553	0.454809	0.542113	0.50698	0.48971	0.116629	0.124424	0.0921418	0.109576	0.111878
	0.338368	0.459032	0.454809	0.553504	0.461158	0.164178	0.141284	0.135842	0.139661	0.120463				0.373712	0.451668	0.481854	0.517632	0.61132	0.126745	0.0956119	0.125	0.110338	0.101532

## Sheet: Figure 4
	Living bacterial											Inactivated bacterial
A	0	104	105	106	107	108	109					0	104	105	106	107	108	109
4EBP1	28.01	28.76	29.05	29.08	26.82	29.48	29.45				A	27.92	28.56	28.65	28.64	26.65	29.07	29.4
	28.7	28.96	28.79	28.94	26.97	29.44	29.56				4EBP1	27.84	28.94	28.52	28.65	26.7	29.2	29.48
	28.4	28.91	29.08	29.18	27.01	29.55	29.39					28.03	28.72	28.6	28.76	26.62	29.15	29.58
	27.97	28.42	28.71	28.64	26.38	29.04	29.01					27.47	28.11	28.2	28.19	26.2	28.62	28.95
	28.36	28.62	28.45	28.5	26.53	29	29.12					27.39	28.09	28.07	28.2	26.25	28.75	28.65
	28.06	28.57	28.74	28.74	26.57	29.11	28.95					27.08	28.27	28.15	28.31	26.17	28.7	29.13
	28.4	28.91	29.08	29.18	26.99	29.53	29.37					28.79	29.43	29.52	29.51	27.42	29.84	30.17
	27.97	28.42	28.71	28.64	26.36	29.02	28.99					28.71	29.81	29.39	29.52	27.47	29.97	29.87
	28.36	28.62	28.45	28.5	26.51	28.98	29.1					28.9	29.59	29.47	29.63	27.39	29.92	30.35
ACTIN	25.16	26.28	26.2	26.33	24.4	27.1	26.9					24.88	26	25.92	26.05	24.12	26.82	26.62
	24.96	25.85	26.32	26.71	25.05	26.82	26.84				ACTIN	24.68	25.57	26.04	26.43	24.77	26.54	26.86
	25.06	25.8	26.09	26.49	24.96	26.93	27.01					24.88	25.52	25.81	26.21	24.68	26.65	26.73
	24.13	24.77	25.06	25.46	23.92	25.89	25.97					24.25	25.37	25.29	25.54	23.65	26.35	26.15
	24.26	25.48	25.4	25.57	23.63	26.33	26.13					24.07	25.14	25.41	25.92	24.3	26.07	26.09
	24.16	25.03	25.52	25.95	24.28	26.05	26.07					24.54	24.89	25.18	25.7	24.21	26.18	26.26
	24.58	25.22	25.51	25.91	24.37	26.34	26.42					25.67	26.79	26.71	26.71	24.78	27.48	27.28
	24.71	25.93	25.85	26.02	24.08	26.78	26.58					25.47	26.36	26.83	27.09	25.43	27.2	27.22
	24.61	25.48	25.97	26.4	24.73	26.5	26.52					25.67	26.31	26.6	26.87	25.34	27.31	27.39
ACTIN(mean value)	25.06	25.9767	26.2033	26.51	24.8033	26.95	26.9167					24.8133	25.6967	25.9233	26.23	24.5233	26.67	26.7367
	24.1833	25.0933	25.3267	25.66	23.9433	26.09	26.0567				ACTIN(mean value)	24.2867	25.1333	25.2933	25.72	24.0533	26.2	26.1667
	24.6333	25.5433	25.7767	26.11	24.3933	26.54	26.5067					25.6033	26.4867	26.7133	26.89	25.1833	27.33	27.2967
Result	0.129408	0.145256	0.139017	0.168404	0.247129	0.173139	0.172739				Result	0.116091	0.13742	0.151075	0.188156	0.228986	0.189465	0.157854
	0.0802141	0.126452	0.16647	0.185565	0.222725	0.178006	0.160058					0.122711	0.105599	0.16532	0.186856	0.221186	0.173139	0.149339
	0.0987552	0.130912	0.136156	0.157127	0.216634	0.164938	0.180075					0.107569	0.122995	0.156402	0.173139	0.233798	0.179244	0.139339
	0.0724602	0.0996721	0.095833	0.126745	0.18471	0.129408	0.129109					0.110083	0.127038	0.133354	0.180491	0.225834	0.186856	0.145256
	0.0552966	0.0867696	0.114758	0.139661	0.16647	0.133046	0.119631					0.11636	0.128812	0.145928	0.179244	0.218141	0.170755	0.178831
	0.068078	0.0898295	0.0938608	0.118257	0.161918	0.123279	0.134592					0.144252	0.113702	0.138057	0.166086	0.230579	0.176777	0.128218
	0.0734717	0.0969465	0.101297	0.11908	0.16532	0.125869	0.13742					0.109829	0.130007	0.142925	0.162668	0.212176	0.175556	0.136471
	0.0989836	0.136156	0.130912	0.173139	0.255843	0.179244	0.178831					0.116091	0.0999026	0.156402	0.161544	0.204948	0.160428	0.168016
	0.0755373	0.118531	0.156764	0.190782	0.230579	0.184284	0.165702					0.101766	0.11636	0.147966	0.149685	0.216634	0.166086	0.120463
	Living bacterial											Inactivated bacterial
B	0	104	105	106	107	108	109				B	0	104	105	106	107	108	109
AKT	25.42	24.62	24.74	24.75	23.48	26.36	28.27				AKT	26.11	26.72	26.51	25.13	27.51	28.58	28.04
	25.7	24.54	24.39	24.82	23.24	26.79	28.39					26.41	26.32	26.87	25.64	27.21	28.65	28.56
	25.48	24.53	24.47	24.64	23.17	26.97	28.22					26.06	26.69	26.79	25.26	27.06	28.16	28.03
	26.53	25.73	25.85	25.86	24.16	27.04	28.95					25.74	26.35	26.14	24.76	27.14	28.21	27.67
	26.81	25.65	25.5	25.93	23.92	27.47	29.07					25.81	26.41	26.27	25.04	26.61	28.05	27.96
	26.59	25.64	25.58	25.75	23.85	27.65	28.9					25.69	26.32	26.42	24.89	26.69	27.79	27.66
	24.64	23.84	23.96	23.97	22.6	25.48	27.39					27.45	28.06	27.85	26.47	28.85	29.92	29.38
	24.92	23.76	23.61	24.04	22.36	25.91	27.51					27.75	27.66	28.21	26.98	28.55	29.99	29.9
	24.7	23.75	23.69	23.86	22.29	26.09	27.34					27.4	28.03	28.13	26.6	28.4	29.5	29.37
ACTIN	24.62	23.35	23.46	23.77	22.71	25.2	26.76				ACTIN	24.53	25.38	25.31	24.04	26.27	26.56	26.15
	24.02	23.75	23.75	24.02	22.8	25.43	26.1					25.24	25.26	25.69	24.04	26.89	26.43	26.09
	24.35	23.49	23.57	24.18	22.18	25.51	26.63					25.33	25.34	25.65	24.11	26.15	26.79	26.85
	24.66	24.29	24.5	24.81	23.41	26.04	27.25					24.06	24.91	24.84	23.57	25.8	26.09	25.68
	24.86	24.09	24.79	25.06	23.61	26.84	27.54					24.77	24.79	25.22	23.57	26.42	25.96	25.62
	24.59	24.33	24.61	25.22	23.34	26.08	27.36					24.86	24.87	25.18	23.64	25.68	26.32	26.38
	23.62	22.35	22.46	22.77	22.03	24.62	26.18					25.64	26.49	26.42	25.15	27.38	27.67	27.26
	23.02	22.75	22.75	23.02	22.12	24.85	25.52					26.35	26.37	26.8	25.15	28	27.54	27.2
	23.35	22.49	22.57	23.18	21.36	24.93	26.05					26.44	26.45	26.76	25.22	27.26	27.9	27.96
ACTIN(mean value)	24.33	23.53	23.5933	23.99	22.5633	25.38	26.4967				ACTIN(mean value)	25.0333	25.3267	25.55	24.0633	26.4367	26.5933	26.3633
	24.7033	24.2367	24.6333	25.03	23.4533	26.32	27.3833					24.5633	24.8567	25.08	23.5933	25.9667	26.1233	25.8933
	23.33	22.53	22.5933	22.99	21.8367	24.8	25.9167					26.1433	26.4367	26.66	25.1733	27.5467	27.7033	27.4733
Result	0.469761	0.469761	0.451668	0.590496	0.529732	0.50698	0.292532				Result	0.474123	0.380684	0.514057	0.477421	0.47522	0.252321	0.312805
	0.386891	0.496546	0.575678	0.562529	0.625609	0.376312	0.269184					0.385108	0.502316	0.400535	0.335256	0.585064	0.240371	0.218141
	0.450625	0.5	0.544624	0.63728	0.656712	0.332171	0.302848					0.490843	0.388683	0.423373	0.436282	0.649169	0.337587	0.31498
	0.281915	0.355191	0.430276	0.562529	0.612734	0.607097	0.337587					0.442372	0.355191	0.479632	0.445449	0.443396	0.235424	0.291857
	0.232183	0.375443	0.548412	0.535887	0.723635	0.450625	0.310644					0.421421	0.340722	0.438303	0.366868	0.640232	0.263036	0.23871
	0.270431	0.378055	0.51883	0.607097	0.759611	0.397768	0.349492					0.457973	0.362654	0.395021	0.407066	0.605696	0.31498	0.293887
	0.403321	0.403321	0.387786	0.50698	0.589134	0.624165	0.360149					0.404254	0.324585	0.438303	0.407066	0.405189	0.215138	0.266708
	0.332171	0.426317	0.494257	0.482968	0.695762	0.463294	0.331405					0.328356	0.428292	0.34151	0.285851	0.498846	0.204948	0.185995
	0.386891	0.429283	0.467596	0.547147	0.730353	0.408951	0.37285					0.41851	0.331405	0.360982	0.371989	0.553504	0.287839	0.268563
	Living bacterial											Inactivated bacterial
C	0	104	105	106	107	108	109				C	0	104	105	106	107	108	109
MTOR	28.62	28.73	28.25	28.11	26.73	27.88	25.44				MTOR	29.91	29.08	29.39	29.11	27.63	28.47	26.91
	28.56	28.81	28.55	28.38	26.39	27.75	25.35					29.49	29.21	29.32	29.43	27.73	28.25	27.03
	28.36	28.46	28.48	28.21	26.54	27.4	25.54					29.61	29.03	29.92	29.53	27.46	28.16	27.02
	29.99	30.1	29.62	29.23	27.85	29	26.56					28.55	27.72	28.03	27.95	26.27	27.11	25.55
	29.93	30.18	29.93	29.5	27.51	28.87	26.47					28.13	27.85	27.96	28.03	26.37	26.89	25.67
	29.73	29.83	29.85	29.33	27.66	28.72	26.66					28.25	27.67	28.56	28.17	26.1	26.8	25.36
	29.86	29.97	29.49	29.1	27.44	28.79	26.35					28.78	27.95	28.26	27.98	26.5	27.34	25.78
	29.8	30.05	29.8	29.37	27.3	28.66	26.26					28.36	28.08	28.19	28.13	26.6	27.12	25.9
	29.6	29.7	29.72	29.2	27.45	28.91	26.45					28.48	27.92	28.81	28.42	26.35	27.05	25.91
ACTIN	24.12	24.35	24.46	24.77	23.51	24.2	21.76				ACTIN	25.62	24.55	25.64	25.57	24.12	24.66	22.63
	24.02	24.5	24.75	25.02	23.8	24.43	22.1					25.32	24.88	25.54	25.72	24.28	24.37	22.68
	24.35	24.49	24.57	25.28	23.98	24.51	22					25.25	24.76	25.77	25.63	24.58	24.75	22.54
	25.54	25.47	25.48	25.84	24.58	25.27	22.83					23.88	22.81	23.9	23.83	22.38	22.92	20.89
	25.14	25.52	25.87	26.09	24.87	25.5	23.17					23.58	23.14	23.8	23.98	22.54	22.63	20.94
	25.47	25.61	25.69	26.35	25.05	25.58	23.18					23.51	23.02	24.03	23.89	22.84	23.01	20.8
	25.16	25.21	25.02	25.68	24.74	25.33	22.59					24.81	23.74	24.83	24.76	23.31	23.85	21.82
	25.48	25.56	25.45	25.63	24.83	25.26	22.93					24.51	24.07	24.73	24.91	23.47	23.56	21.87
	25.11	25.15	25.23	25.89	25.01	25.34	22.94					24.44	23.95	24.96	24.82	23.77	23.94	21.73
ACTIN(mean value)	24.1633	24.4467	24.5933	25.0233	23.7633	24.38	21.9533				ACTIN(mean value)	25.3967	24.73	25.65	25.64	24.3267	24.5933	22.6167
	25.3833	25.5333	25.68	26.0933	24.8333	25.45	23.06					23.6567	22.99	23.91	23.9	22.5867	22.8533	20.8767
	25.25	25.3067	25.2333	25.7333	24.86	25.31	22.82					24.5867	23.92	24.84	24.83	23.5167	23.7833	21.8067
Result	0.0455417	0.0513556	0.0792928	0.117712	0.127922	0.0883883	0.089209				Result	0.0437876	0.0490365	0.0748424	0.0902456	0.101297	0.068078	0.0510009
	0.0474757	0.0485854	0.0644058	0.0976209	0.161918	0.0967228	0.0949514					0.0585847	0.0448111	0.0785633	0.072293	0.0945137	0.0792928	0.0469304
	0.0545353	0.061925	0.0676078	0.109829	0.145928	0.123279	0.083235					0.0539089	0.0507658	0.0518325	0.0674518	0.113965	0.0843969	0.0472568
	0.0410445	0.0421984	0.0651541	0.113702	0.123564	0.0853775	0.0883883					0.033648	0.0376815	0.0575117	0.060371	0.0778406	0.0523137	0.039191
	0.0427875	0.0399222	0.052556	0.0942955	0.156402	0.0934281	0.0940779					0.0450187	0.0344345	0.060371	0.0571145	0.0726278	0.0609316	0.0360631
	0.0491499	0.0508832	0.0555527	0.106088	0.140958	0.103665	0.0824692					0.0414256	0.0390103	0.03983	0.0518325	0.0875752	0.0648537	0.0447077
	0.0409498	0.0394636	0.0523137	0.0969465	0.167241	0.0896222	0.0865693					0.0546614	0.0612138	0.0934281	0.112656	0.126452	0.0849839	0.063666
	0.0426888	0.0373348	0.0421984	0.0803997	0.184284	0.098073	0.0921418					0.073133	0.0559391	0.098073	0.101532	0.117984	0.0989836	0.0585847
	0.0490365	0.0475855	0.0446045	0.0904543	0.166086	0.0824692	0.0807721					0.0672961	0.0625	0.0638133	0.0830429	0.140308	0.103905	0.05818
	Living bacterial											Inactivated bacterial
D	0	104	105	106	107	108	109				D	0	104	105	106	107	108	109
P70S6K	27.7	28.18	27.31	27.83	26.73	27.54	25.19				P70S6K	27.36	28.32	27.47	27.57	26.73	27.85	25.26
	27.26	27.87	27.28	27.25	26.78	27.72	25.29					27.35	28.21	27.59	27.71	26.05	27.64	25.59
	27.45	27.85	26.79	27.59	26.9	27.9	25.43					27.28	28.34	27.53	27.83	26.62	27.52	25.36
	27.21	27.69	26.82	27.34	27.07	27.88	25.73					27.79	28.75	27.9	28	27.16	28.28	25.69
	26.77	27.38	26.79	26.76	27.12	28.06	25.83					27.78	28.64	28.02	28.14	26.48	28.07	26.02
	26.96	27.36	26.3	27.1	27.24	28.24	25.77					27.71	28.77	27.96	28.26	27.05	27.95	25.79
	29.14	29.62	28.75	29.27	28.17	28.65	26.3					26.98	27.94	27.09	27.19	26.35	27.47	24.88
	28.7	29.31	28.72	28.69	28.22	28.83	26.4					26.97	27.83	27.21	27.33	25.67	27.26	25.21
	28.89	29.29	28.23	29.03	28.34	29.01	26.54					26.9	27.96	27.15	27.45	26.24	27.14	24.98
ACTIN	24.13	25.08	24.27	25.04	24.31	24.56	22.15				ACTIN	23.96	24.91	24.14	24.87	24.1	24.39	21.98
	24.24	25.26	23.89	25.04	24.69	24.43	22.09					24.07	25.09	24.52	24.87	23.72	24.26	21.92
	24.3	25.54	24.15	25.11	24.65	24.79	21.85					24.13	25.37	24.48	24.94	23.98	24.62	21.68
	23.8	24.75	23.94	24.71	25.19	25.47	23.02					24.44	25.39	24.62	25.35	24.58	24.87	22.46
	23.91	24.93	23.56	24.71	25.24	25.25	23.12					24.55	25.57	25	25.35	24.2	24.74	22.4
	23.97	25.21	23.82	24.78	25.36	26.03	23.06					24.61	25.85	24.96	25.42	24.46	25.1	22.16
	25.38	26.33	25.52	26.29	25.56	25.48	23.07					23.98	24.93	24.16	24.89	24.12	24.41	22
	25.49	26.51	25.14	26.29	25.94	25.35	23.01					24.09	25.11	24.54	24.89	23.74	24.28	21.94
	25.55	26.79	25.4	26.36	25.9	25.71	22.77					24.15	25.39	24.5	24.96	24	24.64	21.7
ACTIN(mean value)	24.2233	25.2933	24.1033	25.0633	24.55	24.5933	22.03				ACTIN(mean value)	24.0533	25.1233	24.38	24.8933	23.9333	24.4233	21.86
	23.8933	24.9633	23.7733	24.7333	25.2633	25.5833	23.0667					24.5333	25.6033	24.86	25.3733	24.4133	24.9033	22.34
	25.4733	26.5433	25.3533	26.3133	25.8	25.5133	22.95					24.0733	25.1433	24.4	24.9133	23.9533	24.4433	21.88
Result	0.0898295	0.135216	0.108317	0.146943	0.220676	0.129707	0.111878				Result	0.101063	0.109071	0.11744	0.156402	0.143919	0.0929973	0.0947323
	0.121863	0.167628	0.110593	0.219658	0.213159	0.114493	0.104386					0.101766	0.117712	0.108067	0.141938	0.230579	0.107569	0.075363
	0.106826	0.169968	0.155322	0.173539	0.196146	0.101063	0.0947323					0.106826	0.107569	0.112656	0.13061	0.155322	0.116899	0.0883883
	0.100365	0.151075	0.121021	0.164178	0.285851	0.203533	0.157854					0.104627	0.112917	0.121582	0.161918	0.148995	0.0962769	0.098073
	0.136156	0.187288	0.123564	0.245421	0.276114	0.179659	0.147283					0.105355	0.121863	0.111878	0.146943	0.23871	0.111362	0.0780207
	0.119355	0.189903	0.173539	0.193893	0.254076	0.158586	0.153538					0.110593	0.111362	0.116629	0.135216	0.160799	0.121021	0.0915054
	0.0787451	0.118531	0.0949514	0.128812	0.193446	0.113702	0.098073					0.133354	0.143919	0.154963	0.206374	0.189903	0.122711	0.125
	0.106826	0.146943	0.0969465	0.192554	0.186856	0.100365	0.0915054					0.134282	0.155322	0.142595	0.187288	0.304251	0.141938	0.0994421
	0.0936442	0.148995	0.136156	0.152125	0.171943	0.0885928	0.0830429					0.140958	0.141938	0.148651	0.17234	0.204948	0.154249	0.116629
	0.105957	0.157283	0.12449	0.17968	0.222029	0.132189	0.11581					0.115425	0.12463	0.126051	0.159892	0.197492	0.118336	0.0963504
	Living bacterial											Inactivated bacterial
E	0	104	105	106	107	108	109				E	0	104	105	106	107	108	109
PDCD4	27.8	28.09	28.86	29.22	28.53	29.13	29.22				PDCD4	28.73	29.21	29	30.48	30.28	30.95	30.64
	27.82	28.47	28.19	29.08	28.41	28.89	29.08					28.88	29.17	29.05	30.61	30.57	30.6	30.53
	27.62	28.32	28.35	28.72	28.18	28.62	29.4					28.66	29.32	29.45	30.32	30.18	30.7	30.8
	28.17	28.46	29.23	29.65	28.96	29.56	29.65					28.36	28.84	28.63	30.11	29.91	30.42	30.27
	28.19	28.84	28.56	29.51	28.84	29.32	29.51					28.51	28.8	28.68	30.24	30.2	30.23	30.16
	27.99	28.69	28.72	29.15	28.61	29.05	29.83					28.29	28.95	29.08	29.95	29.81	30.33	30.43
	27.13	27.42	28.19	28.55	27.8	28.4	28.49					29.62	30.1	29.89	31.37	31.17	31.44	31.53
	27.15	27.8	27.52	28.41	27.68	28.16	28.35					29.77	30.06	29.94	31.5	31.46	31.49	31.42
	26.95	27.65	27.68	28.05	27.45	27.89	28.67					29.55	30.21	30.34	31.21	31.07	31.59	31.69
ACTIN	25.16	26.28	26.2	26.33	24.4	26.22	26.53				ACTIN	26.71	26.63	27.27	28.16	28.04	28.58	28.55
	25.86	25.85	26.32	26.71	25.05	26.02	26.84					26.85	26.96	27.02	28.07	27.38	28.18	28.02
	25.73	25.8	26.09	26.49	24.96	26.53	26.71					26.16	27.2	27.09	28.03	27.46	27.93	28.26
	25.27	26.39	26.31	26.12	24.19	26.01	26.32					26.44	26.36	27	27.89	27.77	28.31	28.28
	25.97	25.96	26.43	26.5	24.84	25.81	26.63					26.58	26.69	26.75	27.8	27.11	27.91	27.75
	25.84	25.91	26.2	26.28	24.75	26.32	26.5					25.89	26.93	26.82	27.76	27.19	27.66	27.99
	24.71	25.83	25.75	25.88	24.33	26.15	26.46					27.37	27.29	27.93	28.82	28.7	29.24	29.21
	25.41	25.4	25.87	26.26	24.98	25.95	26.77					27.51	27.62	27.68	28.73	28.04	28.84	28.68
	25.28	25.35	25.64	26.04	24.89	26.46	26.64					26.82	27.86	27.75	28.69	28.12	28.59	28.92
ACTIN(mean value)	25.5833	25.9767	26.2033	26.51	24.8033	26.2567	26.6933				ACTIN(mean value)	26.5733	26.93	27.1267	28.0867	27.6267	28.23	28.2767
	25.6933	26.0867	26.3133	26.3	24.5933	26.0467	26.4833					26.3033	26.66	26.8567	27.8167	27.3567	27.96	28.0067
	25.1333	25.5267	25.7533	26.06	24.7333	26.1867	26.6233					27.2333	27.59	27.7867	28.7467	28.2867	28.89	28.9367
Result	0.215138	0.231112	0.158586	0.15283	0.0755373	0.136471	0.173539				Result	0.224274	0.205898	0.272942	0.190342	0.158952	0.151774	0.194342
	0.212176	0.177595	0.252321	0.168404	0.082089	0.161171	0.191224					0.202127	0.211686	0.263645	0.173941	0.130007	0.193446	0.209739
	0.243726	0.197055	0.225834	0.216134	0.0962769	0.194342	0.153184					0.235424	0.190782	0.199805	0.212667	0.170361	0.180491	0.173941
	0.179659	0.192999	0.132433	0.098073	0.0484733	0.0875752	0.111362					0.240371	0.220676	0.292532	0.204004	0.170361	0.181747	0.20829
	0.177186	0.148308	0.21071	0.108067	0.0526776	0.103426	0.122711					0.216634	0.22688	0.282567	0.186425	0.139339	0.20733	0.224793
	0.203533	0.164558	0.188591	0.138696	0.0617821	0.124712	0.0982999					0.252321	0.204476	0.214146	0.227931	0.182588	0.193446	0.186425
	0.250578	0.269184	0.18471	0.178006	0.119355	0.215636	0.274206					0.191224	0.175556	0.23272	0.162292	0.135528	0.170755	0.165702
	0.247129	0.206851	0.293887	0.196146	0.129707	0.254664	0.302149					0.17234	0.180491	0.224793	0.148308	0.110849	0.164938	0.178831
	0.283876	0.229516	0.263036	0.251739	0.152125	0.307076	0.242043					0.200731	0.162668	0.170361	0.181327	0.145256	0.153893	0.148308
	Living bacterial											Inactivated bacterial
F	0	104	105	106	107	108	109				F	0	104	105	106	107	108	109
PI3K	28.37	29.59	29.58	29.67	27.25	28.48	31.34				PI3K	28.35	29.83	30.09	29.95	27.63	28.88	31.56
	28.76	29.61	29.54	29.61	27.38	28.58	30.92					28.25	29.64	30.17	29.88	27.69	29.09	31.38
	28.29	29.82	29.44	29.56	27.26	28.37	31.28					28.48	29.85	29.94	29.93	27.48	28.81	31.42
	27.89	29.11	29.1	29.34	26.92	28.15	31.01					29.02	30.5	30.76	30.62	28.3	29.55	32.23
	28.08	29.13	29.06	29.28	27.05	28.25	30.59					28.72	30.31	30.84	30.55	28.36	29.76	32.05
	27.81	29.34	28.96	29.23	26.93	28.04	30.95					29.05	30.52	30.61	30.6	28.15	29.48	32.09
	29.48	30.7	30.69	30.78	28.03	29.26	31.52					27.46	28.94	29.2	29.06	26.74	27.99	30.67
	29.27	30.72	30.65	30.72	28.16	29.36	31.87					27.36	28.75	29.28	28.99	26.8	28.2	30.49
	29.4	30.93	30.55	30.67	28.04	29.15	31.36					27.19	28.96	29.05	29.04	26.59	27.92	30.53
ACTIN	25.84	26.48	27.05	27.21	25.41	26.01	28.71				ACTIN	25.6	26.24	26.81	26.97	25.17	25.77	28.47
	25.49	27.21	27.37	27.92	25.47	25.62	29.28					25.25	26.97	27.13	27.68	25.23	25.38	28.64
	25.72	26.8	27.41	27.3	25.07	25.92	28.14					25.48	26.56	27.17	27.06	24.83	25.68	27.9
	25.45	26.09	26.66	27.08	25.28	25.88	28.58					26.57	27.21	27.78	27.94	26.14	26.74	29.44
	25.1	26.82	26.98	27.79	25.34	25.49	29.15					26.22	27.94	28.1	28.65	26.2	26.35	30.01
	25.33	26.41	27.02	27.17	24.94	25.79	28.01					26.45	27.53	28.14	28.03	25.8	26.65	28.87
	26.97	27.61	28.18	28.34	25.97	26.57	29.27					24.94	25.58	26.15	26.31	24.51	25.11	27.81
	26.62	28.34	28.5	29.05	26.03	26.18	29.84					24.69	26.31	26.47	27.02	24.57	24.72	27.98
	26.85	27.93	28.54	28.43	25.63	26.48	28.7					24.82	25.9	26.51	26.4	24.17	25.02	27.24
ACTIN(mean value)	25.6833	26.83	27.2767	27.4767	25.3167	25.85	28.71				ACTIN(mean value)	25.4433	26.59	27.0367	27.2367	25.0767	25.61	28.3367
	25.2933	26.44	26.8867	27.3467	25.1867	25.72	28.58					26.4133	27.56	28.0067	28.2067	26.0467	26.58	29.44
	26.8133	27.96	28.4067	28.6067	25.8767	26.41	29.27					24.8167	25.93	26.3767	26.5767	24.4167	24.95	27.6767
Result	0.155322	0.147624	0.202594	0.218646	0.261824	0.161544	0.161544				Result	0.133354	0.105843	0.120463	0.152477	0.170361	0.103665	0.107073
	0.118531	0.145592	0.20829	0.227931	0.239263	0.150726	0.216134					0.142925	0.120742	0.113965	0.160058	0.163421	0.0896222	0.121301
	0.164178	0.125869	0.22324	0.235969	0.260015	0.174343	0.168404					0.121863	0.104386	0.133662	0.154606	0.189027	0.108819	0.117984
	0.16532	0.157127	0.215636	0.251158	0.300756	0.185565	0.185565					0.164178	0.130308	0.148308	0.187722	0.209739	0.127627	0.144586
	0.14492	0.154963	0.221698	0.261824	0.274841	0.173139	0.248273					0.202127	0.148651	0.140308	0.197055	0.201195	0.110338	0.163799
	0.174746	0.133972	0.23761	0.271057	0.298679	0.200267	0.193446					0.160799	0.128514	0.164558	0.190342	0.23272	0.133972	0.15932
	0.15749	0.149685	0.205423	0.221698	0.224793	0.138696	0.210224					0.160058	0.124137	0.141284	0.178831	0.199805	0.121582	0.125579
	0.182167	0.147624	0.211198	0.231112	0.205423	0.129408	0.164938					0.171546	0.14161	0.133662	0.187722	0.191666	0.105112	0.142266
	0.16647	0.127627	0.226356	0.239263	0.22324	0.149685	0.234881					0.192999	0.122428	0.156764	0.181327	0.221698	0.127627	0.138376

## Sheet: Figure 5
		A									B
	mTOR				Living bacterial									Inactivated bacterial
		0	104	105	106	107	108	109			0	104	105	106	107	108	109
		40.738	33.035	59.667	54.395	73.286	73.744	41.413			44.388	66.931	61.197	70.272	71.333	64.014	55.314
		37.562	44.257	56.663	58.657	70.369	79.459	37.426			53.548	80.285	77.248	83.767	87.163	79.456	70.345
		39.17	46.64	58.161	56.524	71.827	76.6	39.421			45.737	67.887	62.075	70.909	71.723	64.897	56.629
		59.617	55.983	80.93	76.408	91.505	91.539	62.114			51.588	77.24	69.725	79.928	80.688	72.691	63.906
		51.615	48.527	70.906	66.448	79.32	79.008	53.997			50.396	76.898	68.876	81.102	78.826	72.341	63.346
		58.48	55.009	79.167	74.982	88.56	89.765	60.416			57.33	86.17	76.412	91.902	88.732	77.841	71.232
		56.351	53.311	77.869	72.167	86.683	86.526	58.78			50.162	75.249	69.694	81.131	77.707	72.146	63.635
		52.813	54.819	73.247	67.82	81.303	79.686	54.242			54.013	81.095	72.935	83.378	81.476	74.967	66.521
		51.775	43.136	71.911	66.444	80.045	80.164	54.331			39.145	59.675	56.419	63.619	63.606	59.898	48.304
	PI3K
		0	104	105	106	107	108	109			0	104	105	106	107	108	109
		83.377	97.988	96.763	78.248	117.994	88.014	96.504			60.282	51.394	49.941	66.775	81.17	70.546	64.92
		80.256	94.332	94.257	96.258	110.369	86.254	93.42			61.539	53.716	47.401	65.23	81.555	76.712	61.68
		82.32	97.27	97.3	87.254	115.12	88.13	94.16			68.615	52.497	48.057	66.775	82.29	77.375	59.293
		97.133	85.712	84.773	70.617	104.044	79.085	83.52			72.207	46.994	41.334	55.39	70.912	63.773	57.812
		98.169	93.722	88.483	73.966	113.76	82.959	89.317			62.555	40.532	35.913	47.615	60.665	56.169	50.883
		84.59	75.053	73.544	64.368	96.036	71.143	77.933			61.313	39.245	34.222	46.915	57.507	53.66	48.86
		83.356	82.561	80.8	62.527	96.064	72.838	78.631			62.339	41.216	37.292	50.25	61.755	54.828	50.362
		88.514	80.938	81.931	69.534	102.411	77.408	84.285			55.143	36.073	32.152	42.935	57.359	50.327	45.744
		83.323	78.351	74.99	64.21	93.264	69.339	71.863			62.519	40.961	34.36	47.86	59.94	54.567	49.777
	P70S6K
		0	104	105	106	107	108	109			0	104	105	106	107	108	109
		36.168	36.386	33.156	46.459	63.627	66.271	69.143			51.222	29.077	42.399	68.951	78.481	68.522	52.041
		45.624	43.469	37.851	47.479	64.615	65.917	59.757			42.777	26.236	38.23	61.036	71.315	60.942	46.949
		46.162	40.282	48.124	57.177	66.285	61.094	60.261			52.869	31.863	46.851	73.327	84.277	72.212	54.947
		41.615	57.835	53.779	77.969	84.072	75.763	52.453			40.714	24.896	37.679	57.616	68.179	56.67	42.699
		40.688	56.436	53.069	76.124	82.095	75.089	49.38			36.791	19.909	31.178	49.652	58.1	41.732	38.07
		42.895	60.276	61.983	74.989	80.293	73.525	50.787			36.436	22.476	32.995	52.011	63.669	51.247	40.565
		39.27	54.366	50.636	73.63	79.122	71.557	49.775			39.627	25.521	35.016	52.737	66.321	55.771	41.978
		35.124	49.004	45.776	65.76	72.938	64.655	44.063			42.788	24.858	36.095	59.709	67.161	57.155	43.348
		38.414	53.812	50.486	72.26	78.112	70.256	48.935			39.836	24.695	33.698	54.59	65.014	55.449	41.662
	PDCD4
		0	104	105	106	107	108	109			0	104	105	106	107	108	109
		67.128	75.694	52.431	39.238	54.717	53.161	64.07			62.688	63.477	61.673	42.663	38.966	44.875	52.477
		77.38	87.988	61.264	46.271	63.881	61.952	74.278			50.229	50.827	48.167	35.146	31.085	36.31	40.836
		82.186	89.645	61.829	47.281	67.011	64.524	77.886			56.502	57.385	56.271	38.799	34.933	41.098	47.53
		87.123	95.972	61.345	42.46	67.121	68.25	88.301			66.219	64.465	64.277	43.291	40.363	46.67	54.727
		67.8	73.713	48.914	32.605	52.5	55.463	71.853			56.495	56.603	56.363	39.229	35.336	41.655	48.428
		71.558	78.774	51.858	34.22	55.084	55.777	71.67			61.552	62.229	60.742	42.093	38.519	44.965	52.221
		78.356	88.696	56.948	39.894	61.333	64.017	81.214			56.096	57.178	55.585	38.903	36.002	40.063	48.108
		70.99	80.063	51.017	36.084	54.326	56.703	74.341			53.651	54.313	51.851	36.132	32.632	36.597	41.868
		68.079	78.422	53.283	35.429	53.944	56.135	73.426			59.289	59.979	58.046	41.827	37.292	43.837	50.249
	AKT	0	104	105	106	107	108	109			0	104	105	106	107	108	109
		19.185	43.878	67.447	60.784	84.196	62.86	63.655			61.303	62.42	51.767	75.582	87.33	65.438	56.144
		16.208	33.767	52.421	45.965	62.626	46.884	46.656			51.385	51.355	43.277	64.113	72.433	54.072	46.388
		17.311	37.013	56.951	51.802	70.234	52.52	53.084			43.134	42.588	35.848	53.745	59.493	44.326	39.331
		18.264	42.152	64.469	60.575	80.715	61.03	62.204			68.869	67.924	54.193	83.684	93.813	70.851	61.793
		18.976	44.977	69.251	62.979	86.583	63.806	64.118			71.159	69.35	57.908	85.247	97.855	69.695	61.649
		22.438	52.36	80.697	74.182	101.496	77.104	77.865			65.189	65.948	53.775	81.332	92.147	65.487	58.875
		20.28	46.692	71.422	65.98	90.271	67.659	68.11			52.985	57.103	46.915	67.445	78.02	55.398	49.801
		20.341	46.842	72.426	64.875	90.522	67.226	68.192			62.218	63.649	51.028	77.851	88.819	64.436	56.637
		17.772	40.356	61.951	57.924	76.74	58.472	59.159			68.042	65.79	55.913	81.517	94.133	70.12	59.938
	4EBP1	0	104	105	106	107	108	109			0	104	105	106	107	108	109
		30.868	35.805	49.524	67.248	73.584	63.065	46.587			15.719	32.36	40.111	50.343	76.363	61.855	8.699
		30.184	36.082	43.115	74.288	80.621	62.007	52.291			14.896	30.682	39.17	48.905	73.66	59.164	8.886
		30.988	39.752	47.882	73.329	90.707	56.383	46.892			14.993	31.247	39.624	48.564	73.34	62.529	8.377
		60.822	77.893	94.066	99.536	111.28	102.355	98.15			20.601	41.146	52.832	65.456	96.493	79.332	13.765
		59.434	75.908	90.233	90.822	102.089	90.733	87.52			18.194	38.47	47.622	59.716	90.209	73.263	10.02
		65.686	82.675	100.523	99.196	109.86	99.54	95.879			19.144	39.948	49.785	62.398	94.449	76.093	10.33
		65.979	83.345	101.534	101.34	111.857	101.792	97.355			14.301	29.466	37.661	47.159	70.352	56.98	8.416
		62.721	79.259	94.319	93.516	106.794	94.838	90.725			18.884	38.757	48.506	60.951	90.578	73.584	9.647
		59.628	75.014	90.257	90.822	101.822	90.975	87.863			14.126	28.879	35.611	44.333	66.46	55.208	7.87

## Sheet: Figure 6
A										B
						Control-PI3K	Living bacteria-PI3K	Inactived bacteria-PI3K	Control-AKT	Living bacteria-AKT	Inactived bacteria-AKT	Control-mtor	Living bacteria-MTOR	Inactived bacteria-MTOR	Control-4EBP1	Living bacteria-4EBP1	Inactived bacteria-4EBP1	Control-P70S6K	Living bacteria-p70s6k	Inactived bacteria-P70S6K	Control-PDCD4	Living bacteria-PDCD4	Inactived bacteria-PDCD4
ｍｔｏｒ	ＬＢ	Inactived bacteria	Living bacteria		Gene	33.88	32.08	32.35	33.27	31.48	31.43	30.42	28.88	30.5	28.51	28.51	27.91	28.76	27.62	27.22	29.81	30.41	29.13
	15.301	36.246	65.345			34.08	31.96	32.04	33.1	31.85	32	30.38	28.45	29.23	28.41	28.45	28.38	28.89	27.38	27.3	30.54	29.77	29.15
	17.71	42.773	62.742			33.49	31.51	31.98	33.05	31.2	31.5	30.61	29	30.01	28.62	28.36	28.31	28.37	27.31	27.83	30.57	30.26	29.21
	24.915	42.276	60.193
	17.097	42.947	75.132			33.62	31.82	32.09	33.01	31.22	31.17	30.16	28.92	30.24	29.25	29.25	27.45	28.8	27.36	27.76	30.35	30.35	28.97
	21.074	49.669	71.784			33.82	31.7	31.78	32.84	31.59	31.74	30.12	28.89	29.97	29.15	29.19	27.82	29.63	27.22	27.64	30.28	30.51	28.89
	29.306	49.148	67.925			33.23	31.25	31.72	32.79	30.94	31.24	30.35	29.14	29.75	29.06	29.1	28.15	29.11	27.75	27.57	30.31	30	28.35
	14.9	37.097	69.229
	18.042	42.973	66.055			31.32	29.52	29.79	30.91	28.92	28.87	28.26	27.32	27.94	28.55	26.95	27.15	28.25	27.06	26.96	28.25	29.35	27.67
	25.262	44.569	62.505			31.52	29.4	29.48	30.89	29.29	29.44	28.82	27.29	27.67	28.27	26.89	27.42	28.63	26.82	26.74	28.68	29.31	27.59
						30.93	28.95	29.42	30.79	28.64	28.94	28.55	27.24	27.45	28.36	26.8	27.75	28.21	26.85	26.87	28.91	29.27	27.65
ＰＩ３Ｋ	ＬＢ	Inactived bacteria	Living bacteria
	32.287	48.683	76.019
	43.501	47.134	86.387		ACTIN	25.96	25.57	24.54	25.96	25.57	24.54	25.96	25.57	24.54	25.96	25.57	24.54	25.96	25.57	24.54	25.96	25.57	24.54
	35.722	65.468	85.075			25.32	25.35	25.55	25.32	25.35	25.55	25.32	25.35	25.55	25.32	25.35	25.55	25.32	25.35	25.55	25.32	25.35	25.55
	31.891	52.306	82.366			25.44	25.64	25.05	25.44	25.64	25.05	25.44	25.64	25.05	25.44	25.64	25.05	25.44	25.64	25.05	25.44	25.64	25.05
	46.582	46.563	91.906
	38.524	63.664	85.522			26.62	26.23	25.2	26.62	26.23	25.2	26.62	26.23	25.2	26.62	26.23	25.2	26.62	26.23	25.2	26.62	26.23	25.2
	32.671	51.144	79.714			25.98	26.01	26.21	25.98	26.01	26.21	25.98	26.01	26.21	25.98	26.01	26.21	25.98	26.01	26.21	25.98	26.01	26.21
	45.703	44.783	91.246			26.1	26.3	25.71	26.1	26.3	25.71	26.1	26.3	25.71	26.1	26.3	25.71	26.1	26.3	25.71	26.1	26.3	25.71
	37.741	66.608	95.84
						26.21	25.82	24.79	26.21	25.82	24.79	26.21	25.82	24.79	26.21	25.82	24.79	26.21	25.82	24.79	26.21	25.82	24.79
Ｐ７０Ｓ６Ｋ	ＬＢ	Inactived bacteria	Living bacteria			25.57	25.6	25.8	25.57	25.6	25.8	25.57	25.6	25.8	25.57	25.6	25.8	25.57	25.6	25.8	25.57	25.6	25.8
	44.288	62.14	83.493			25.69	25.89	25.3	25.69	25.89	25.3	25.69	25.89	25.3	25.69	25.89	25.3	25.69	25.89	25.3	25.69	25.89	25.3
	57.763	64.576	83.45
	52.653	67.05	66.61		ACTIN(mean value)	25.5733	25.52	25.0467	25.5733	25.52	25.0467	25.5733	25.52	25.0467	25.5733	25.52	25.0467	25.5733	25.52	25.0467	25.5733	25.52	25.0467
	39.652	54.275	69.184			26.2333	26.18	25.7067	26.2333	26.18	25.7067	26.2333	26.18	25.7067	26.2333	26.18	25.7067	26.2333	26.18	25.7067	26.2333	26.18	25.7067
	43.195	48.34	62.401			25.8233	25.77	25.2967	25.8233	25.77	25.2967	25.8233	25.77	25.2967	25.8233	25.77	25.2967	25.8233	25.77	25.2967	25.8233	25.77	25.2967
	40.004	50.131	71.366
	42.607	60.427	81.722		RESULT	0.00315823	0.0105985	0.00633108	0.00482028	0.0160643	0.0119791	0.0347543	0.0973956	0.0228235	0.13061	0.125869	0.13742	0.109829	0.233258	0.221698	0.053044	0.0337259	0.0589921
	56.284	63.264	81.239			0.0027494	0.0115177	0.00784868	0.0054231	0.0124303	0.00806934	0.0357313	0.131215	0.0550416	0.139984	0.131215	0.0992126	0.100365	0.275476	0.209739	0.0319804	0.052556	0.05818
	50.589	65.518	65.454			0.00413853	0.0157337	0.00818199	0.00561434	0.0195052	0.0114118	0.0304658	0.0896222	0.0320544	0.121021	0.139661	0.104145	0.143919	0.289172	0.145256	0.0313223	0.0374212	0.05581
ＰＤＣＤ４	ＬＢ	Inactived bacteria	Living bacteria			0.00597574	0.0200535	0.0119791	0.00912053	0.0303955	0.0226659	0.0657591	0.149685	0.0431848	0.123564	0.11908	0.298679	0.168794	0.441351	0.240927	0.0576448	0.0555527	0.104145
	58.758	57.01	14.346			0.00520218	0.0217929	0.0148506	0.0102611	0.0235195	0.0152681	0.0676078	0.15283	0.0520725	0.132433	0.124137	0.231112	0.0949514	0.486327	0.261824	0.0605107	0.049721	0.110083
	64.445	60.709	10.386			0.00783057	0.0297699	0.0154813	0.010623	0.036906	0.0215924	0.0576448	0.128514	0.0606506	0.140958	0.132127	0.183858	0.136156	0.336808	0.274841	0.0592654	0.0708052	0.160058
	67.061	54.15	6.06
	49.12	47.98	12.256			0.0221482	0.0743254	0.0443989	0.029428	0.112656	0.0840078	0.18471	0.34151	0.160058	0.151075	0.441351	0.276752	0.185995	0.408951	0.315709	0.185995	0.0836205	0.192999
	52.639	50.914	9.647			0.0192811	0.0807721	0.0550416	0.0298388	0.0871715	0.056589	0.125289	0.348686	0.192999	0.183434	0.460094	0.229516	0.142925	0.482968	0.367717	0.138057	0.0859714	0.204004
	56.405	45.033	5.397			0.0290229	0.110338	0.057379	0.0319804	0.136787	0.080029	0.151075	0.360982	0.224793	0.17234	0.48971	0.182588	0.191224	0.473029	0.336031	0.117712	0.0883883	0.195693
	45.401	43.848	10.742
	49.99	47.527	8.514
	52.158	40.103	7.454
AKT	ＬＢ	Inactived bacteria	Living bacteria
	28.133	49.299	80.379
	23.882	53.459	99.905
	35.186	63.659	90.167
	23.476	40.977	65.956
	19.69	45.327	80.213
	30.362	55.539	76.457
	32.098	53.709	83.685
	26.637	59.882	104.637
	39.413	71.486	99.793
4EBP1	ＬＢ	Inactived bacteria	Living bacteria
	47.448	52.808	77.859
	55.568	59.844	69.789
	59.557	72.044	53.994
	44.854	50.023	74.636
	52.903	55.243	65.727
	56.468	68.327	50.624
	42.607	48.068	70.302
	50.055	55.098	62.996
	53.533	64.934	49.465

## Sheet: Figure 7
Item	LB(CON)			Living supernatant			Inactivated supernatant
Asp	0.048	0.039	0.045	0.081	0.081	0.079	0.0803333	0.139	0.139	0.1381
Thr	0.0373	0.0371	0.0369	0.0903	0.0878	0.0882	0.0887667	0.1423	0.141	0.1413
Ser	0.2347	0.2342	0.2339	0.2308	0.2314	0.2347	0.2323	0.2822	0.2733	0.2725
Glu	0.4431	0.4433	0.4434	0.2411	0.2408	0.2409	0.240933	0.1496	0.1527	0.1512
Gly	0.0567	0.0552	0.0558	0.0526	0.0531	0.0528	0.0528333	0.0333	0.033	0.0335
Ala	0.1588	0.1581	0.1572	0.2515	0.2532	0.2524	0.252367	0.4058	0.3985	0.4012
Val	0.1369	0.1365	0.1373	0.2194	0.2202	0.2197	0.219767	0.2245	0.2238	0.2241
Met	0.0679	0.0679	0.0682	0.1087	0.1091	0.1088	0.108867	0.1271	0.1267	0.1268
Ile	0.1122	0.1111	0.1115	0.1789	0.1795	0.1793	0.179233	0.1913	0.1914	0.1913
Leu	0.3021	0.2993	0.3012	0.4831	0.4872	0.4872	0.485833	0.6041	0.6038	0.604
Tyr	0.0793	0.0781	0.0788	0.0193	0.0214	0.0207	0.0204667	0.0159	0.016	0.0154
Phe	0.3773	0.3766	0.3768	0.257	0.2563	0.2566	0.256633	0.16	0.1598	0.1594
His	0.2004	0.2011	0.2007	0.1097	0.1098	0.1092	0.109567	0.0697	0.0693	0.0688
Lys	0.0104	0.0115	0.0109	0.0092	0.0098	0.0095	0.0095	0.5558	0.5548	0.5551
Arg	0.3561	0.3546	0.3552	0.0377	0.0381	0.0376	0.0378	0.0239	0.0236	0.024
Pro	0.0223	0.02196	0.02214	0.0189	0.0119	0.0133	0.0147	0.00992	0.01082	0.01071
Cys	0.1231	0.1228	0.1198	0.1569	0.1578	0.1573	0.157333	0.1342	0.1332	0.1326

## Sheet: Figure 8
		A
	mTOR	LB	Bacterial culture supernatant			Control-PI3K	Bacterial culture supernatant-PI3K	Control-AKT	Bacterial culture supernatant-AKT	Control-mTOR	Bacterial culture supernatant-mTOR	Control-P70S6K	Bacterial culture supernatant-P70S6K	Control-4EBP1	Bacterial culture supernatant-4EBP1	Control-PDCD4	Bacterial culture supernatant-PDCD4
					Gene	29.76	26.42	34.25	28.23	30.63	28.07	29.16	26.61	28.5	25.89	29.7	29.04
		46.705	80.794			29.95	26.84	31.57	28.75	30.57	28.38	30.11	26.47	28.34	25.54	29.12	28.42
		50.545	88.102			29.11	26.55	32.11	29.52	30.74	28.18	29.79	26.23	28.56	25.59	29.34	29.04
		50.073	58.699
		38.52	67.557			29.58	26.94	34.47	28.45	30.85	28.29	29.38	26.83	28.82	26.11	29.92	29.26
		41.865	74.5			29.47	26.86	31.79	28.97	30.79	28.6	30.33	26.69	28.96	25.96	29.34	28.64
		41.706	48.799			29.13	27.17	32.33	29.74	30.96	28.4	30.01	26.45	28.78	26.21	29.56	29.26
		46.568	80.39
		50.603	87.489			28.53	26.09	32.52	26.5	28.9	26.34	27.43	24.88	27.77	24.46	27.97	27.31
		49.973	59.181			28.12	25.81	29.84	27.02	28.84	26.65	28.38	24.74	27.61	24.51	27.39	26.69
						28.48	26.02	30.38	27.79	29.01	26.45	28.06	24.87	27.83	24.56	27.61	27.31
	PI3K	LB	Bacterial culture supernatant
		42.913	57.235
		42.734	57.777		Actin	26.05	23.95	26.05	23.95	26.05	23.95	26.05	23.95	26.05	23.95	26.05	23.95
		43.607	55.531			26.4	24.16	26.4	24.16	26.4	24.16	26.4	24.16	26.4	24.16	26.4	24.16
		55.057	71.844			26.6	23.86	26.6	23.86	26.6	23.86	26.6	23.86	26.6	23.86	26.6	23.86
		55.668	73.154
		57.452	71.988			26.38	24.28	26.38	24.28	26.38	24.28	26.38	24.28	26.38	24.28	26.38	24.28
		41.672	57.808			26.73	24.49	26.73	24.49	26.73	24.49	26.73	24.49	26.73	24.49	26.73	24.49
		42.338	58.573			26.93	24.19	26.93	24.19	26.93	24.19	26.93	24.19	26.93	24.19	26.93	24.19
		45.028	54.096
						24.83	22.73	24.83	22.73	24.83	22.73	24.83	22.73	24.83	22.73	24.83	22.73
	P70S6K	LB	Bacterial culture supernatant			25.18	22.94	25.18	22.94	25.18	22.94	25.18	22.94	25.18	22.94	25.18	22.94
		46.551	65.347			25.38	22.64	25.38	22.64	25.38	22.64	25.38	22.64	25.38	22.64	25.38	22.64
		48.992	74.671
		49.991	76.419		ACTIN(mean value)	26.35	23.99	26.35	23.99	26.35	23.99	26.35	23.99	26.35	23.99	26.35	23.99
		48.053	66.437			26.68	24.32	26.68	24.32	26.68	24.32	26.68	24.32	26.68	24.32	26.68	24.32
		49.186	74.959			25.13	22.77	25.13	22.77	25.13	22.77	25.13	22.77	25.13	22.77	25.13	22.77
		49.232	77.422
		43.098	60.395		Result	0.0940779	0.185565	0.00418662	0.0529216	0.0514744	0.0591286	0.142595	0.162668	0.225313	0.267943	0.098073	0.0301855
		44.454	68.269			0.0824692	0.138696	0.0268302	0.036906	0.0536603	0.0476956	0.073812	0.179244	0.251739	0.34151	0.146604	0.0463914
		45.202	69.654			0.147624	0.169576	0.018453	0.0216423	0.0476956	0.0547879	0.0921418	0.211686	0.216134	0.329877	0.125869	0.0301855
	PDCD4	LB	Bacterial culture supernatant			0.133972	0.162668	0.00451831	0.0571145	0.0555527	0.0638133	0.153893	0.175556	0.22688	0.289172	0.105843	0.0325771
		64.21	50.032			0.144586	0.171943	0.0289559	0.03983	0.0579118	0.0514744	0.07966	0.193446	0.205898	0.320856	0.15822	0.0500669
		69.229	48.656			0.183011	0.138696	0.019915	0.023357	0.0514744	0.0591286	0.0994421	0.228458	0.233258	0.269807	0.135842	0.0325771
		57.591	35.018
		71.999	56.311			0.0947323	0.100134	0.00596195	0.075363	0.0733022	0.0842021	0.203063	0.231647	0.160428	0.309927	0.139661	0.0429857
		76.682	53.706			0.125869	0.121582	0.0382075	0.052556	0.076415	0.0679209	0.105112	0.255253	0.179244	0.29937	0.208772	0.0660636
		65.113	39.079			0.098073	0.105112	0.026278	0.0308198	0.0679209	0.0780207	0.131215	0.233258	0.153893	0.289172	0.179244	0.0429857
		61.26	48.206
		66.956	45.795
		56.046	33.516
	AKT	LB	Bacterial culture supernatant
		44.542	77.31
		58.62	73.311
		66.797	65.773
		39.355	68.017
		50.699	64.499
		56.144	58.342
		47.977	84.494
		62.212	80.988
		72.114	73.93
	4EBP1	LB	Bacterial culture supernatant
		58.02	60.562
		53.201	62.02
		55.941	76.771
		40.166	43.768
		36.406	41.24
		39.092	57.336
		46.88	47.461
		39.595	46.463
		42.804	62.944

## Sheet: Figure 9
PI3K	Control	LY294002			MTOR	Control	Rapamycin
	81.731	55.362				65.279	27.169
	76.682	48.445				59.226	15.248
	80.129	57.639				49.514	14.265
	72.922	50.845				67.736	28.95
	73.037	43.503				66.356	17.554
	74.43	51.908				51.546	14.718
	82.223	56.673				78.205	33.293
	79.156	49.33				76.645	19.234
	81.867	59.031				60.186	19.081
AKT	Control	LY294002
	55.029	35.347			P70S6K	Control	Rapamycin
	59.916	30.255				58.022	28.045
	52.506	31.131				63.451	37.058
	94.066	54.408				61.267	36.758
	92.835	53.776				52.074	24.696
	81.477	57.902				58.326	33.002
	91.344	50.534				55.751	33.127
	84.437	49.588				48.476	22.598
	76.035	54.131				53.029	30.363
						51.37	30.511
